# Supplementary material
Source: publisher site journal article supplement (https://www.spandidos-publications.com/5235/downloadSupplementary)
Supplement: Supplementary file 1 [file downloadSupplementary]

## Sheet: Table SIV
Table SIV. Proteases and cleavage sites predicted to be involved in the generation of UMOD-P1 to UMOD-P5.
Peptide ID	Parent protein AC from input	Start amino acid	End amino acid	N or C-terminus	Protease Human/Mouse/Rat	Cleavage site	Source	Plausible proteolysis	Probability calculated	Threshold applied (value)	Sensitivity	Specificity
UMOD-P4	P07911	589	606	N-terminus	Ctsb (P00787; CATB_RAT). CTSB (P07858; CATB_HUMAN). Ctsb (P10605; CATB_MOUSE)	TRFRSGSV	MEROPS:C01.060	Endopeptidase (input)	-22.76	MEROPS score threshold (-23.76)	79	80.99
UMOD-P5	P07911	589	607	N-terminus	Ctsb (P00787; CATB_RAT). CTSB (P07858; CATB_HUMAN). Ctsb (P10605; CATB_MOUSE)	TRFRSGSV	MEROPS:C01.060	Endopeptidase (input)	-22.76	MEROPS score threshold (-23.76)	79	80.99
UMOD-P2	P07911	593	606	N-terminus	Mme (P07861; NEP_RAT). MME (P08473; NEP_HUMAN). Mme (Q61391; NEP_MOUSE)	SGSVIDQS	MEROPS:M13.001	Endopeptidase (input)	-23.75	MEROPS score threshold (-24.37)	58	87.21
UMOD-P4	P07911	589	606	N-terminus	ADAMTS4 (O75173; ATS4_HUMAN). Adamts4 (Q8BNJ2; ATS4_MOUSE)	TRFRSGSV	MEROPS:M12.221	Endopeptidase (input)	-22.3	MEROPS score threshold (-23.05)	94	85.47
UMOD-P5	P07911	589	607	N-terminus	ADAMTS4 (O75173; ATS4_HUMAN). Adamts4 (Q8BNJ2; ATS4_MOUSE)	TRFRSGSV	MEROPS:M12.221	Endopeptidase (input)	-22.3	MEROPS score threshold (-23.05)	94	85.47
UMOD-P1	P07911	594	606	C-terminus	TMPRSS7 (Q7RTY8; TMPS7_HUMAN). Tmprss7 (Q8BIK6; TMPS7_MOUSE)	PITRKGVQ	MEROPS:S01.072	Endopeptidase (input)	-18.42	MEROPS score threshold (-22.87)	64	94.17
UMOD-P2	P07911	593	606	C-terminus	TMPRSS7 (Q7RTY8; TMPS7_HUMAN). Tmprss7 (Q8BIK6; TMPS7_MOUSE)	PITRKGVQ	MEROPS:S01.072	Endopeptidase (input)	-18.42	MEROPS score threshold (-22.87)	64	94.17
UMOD-P3	P07911	595	606	C-terminus	TMPRSS7 (Q7RTY8; TMPS7_HUMAN). Tmprss7 (Q8BIK6; TMPS7_MOUSE)	PITRKGVQ	MEROPS:S01.072	Endopeptidase (input)	-18.42	MEROPS score threshold (-22.87)	64	94.17
UMOD-P4	P07911	589	606	N-terminus	TMPRSS7 (Q7RTY8; TMPS7_HUMAN). Tmprss7 (Q8BIK6; TMPS7_MOUSE)	TRFRSGSV	MEROPS:S01.072	Endopeptidase (input)	-20.7	MEROPS score threshold (-22.87)	64	94.17
UMOD-P4	P07911	589	606	C-terminus	TMPRSS7 (Q7RTY8; TMPS7_HUMAN). Tmprss7 (Q8BIK6; TMPS7_MOUSE)	PITRKGVQ	MEROPS:S01.072	Endopeptidase (input)	-18.42	MEROPS score threshold (-22.87)	64	94.17
UMOD-P5	P07911	589	607	N-terminus	TMPRSS7 (Q7RTY8; TMPS7_HUMAN). Tmprss7 (Q8BIK6; TMPS7_MOUSE)	TRFRSGSV	MEROPS:S01.072	Endopeptidase (input)	-20.7	MEROPS score threshold (-22.87)	64	94.17
UMOD-P5	P07911	589	607	C-terminus	TMPRSS7 (Q7RTY8; TMPS7_HUMAN). Tmprss7 (Q8BIK6; TMPS7_MOUSE)	ITRKGVQA	MEROPS:S01.072	Endopeptidase (input)	-21.8	MEROPS score threshold (-22.87)	64	94.17
UMOD-P1	P07911	594	606	C-terminus	Gzma (P11032; GRAA_MOUSE). GZMA (P12544; GRAA_HUMAN)	PITRKGVQ	MEROPS:S01.135	Endopeptidase (input)	-18.69	MEROPS score threshold (-21.78)	80	94.96
UMOD-P2	P07911	593	606	C-terminus	Gzma (P11032; GRAA_MOUSE). GZMA (P12544; GRAA_HUMAN)	PITRKGVQ	MEROPS:S01.135	Endopeptidase (input)	-18.69	MEROPS score threshold (-21.78)	80	94.96
UMOD-P3	P07911	595	606	C-terminus	Gzma (P11032; GRAA_MOUSE). GZMA (P12544; GRAA_HUMAN)	PITRKGVQ	MEROPS:S01.135	Endopeptidase (input)	-18.69	MEROPS score threshold (-21.78)	80	94.96
UMOD-P4	P07911	589	606	N-terminus	Gzma (P11032; GRAA_MOUSE). GZMA (P12544; GRAA_HUMAN)	TRFRSGSV	MEROPS:S01.135	Endopeptidase (input)	-17.72	MEROPS score threshold (-21.78)	80	94.96
UMOD-P4	P07911	589	606	C-terminus	Gzma (P11032; GRAA_MOUSE). GZMA (P12544; GRAA_HUMAN)	PITRKGVQ	MEROPS:S01.135	Endopeptidase (input)	-18.69	MEROPS score threshold (-21.78)	80	94.96
UMOD-P5	P07911	589	607	N-terminus	Gzma (P11032; GRAA_MOUSE). GZMA (P12544; GRAA_HUMAN)	TRFRSGSV	MEROPS:S01.135	Endopeptidase (input)	-17.72	MEROPS score threshold (-21.78)	80	94.96
UMOD-P5	P07911	589	607	C-terminus	Gzma (P11032; GRAA_MOUSE). GZMA (P12544; GRAA_HUMAN)	ITRKGVQA	MEROPS:S01.135	Endopeptidase (input)	-21.29	MEROPS score threshold (-21.78)	80	94.96
UMOD-P4	P07911	589	606	N-terminus	KLK2 (P20151; KLK2_HUMAN)	TRFRSGSV	MEROPS:S01.161	Endopeptidase (input)	-17.19	99th percentile (-18.81)	25	99.81
UMOD-P5	P07911	589	607	N-terminus	KLK2 (P20151; KLK2_HUMAN)	TRFRSGSV	MEROPS:S01.161	Endopeptidase (input)	-17.19	99th percentile (-18.81)	25	99.81
UMOD-P1	P07911	594	606	C-terminus	Hpn (O35453; HEPS_MOUSE). HPN (P05981; HEPS_HUMAN). Hpn (Q05511; HEPS_RAT)	PITRKGVQ	MEROPS:S01.224	Endopeptidase (input)	-17.96	MEROPS score threshold (-22.19)	66	98.56
UMOD-P2	P07911	593	606	C-terminus	Hpn (O35453; HEPS_MOUSE). HPN (P05981; HEPS_HUMAN). Hpn (Q05511; HEPS_RAT)	PITRKGVQ	MEROPS:S01.224	Endopeptidase (input)	-17.96	MEROPS score threshold (-22.19)	66	98.56
UMOD-P3	P07911	595	606	C-terminus	Hpn (O35453; HEPS_MOUSE). HPN (P05981; HEPS_HUMAN). Hpn (Q05511; HEPS_RAT)	PITRKGVQ	MEROPS:S01.224	Endopeptidase (input)	-17.96	MEROPS score threshold (-22.19)	66	98.56
UMOD-P4	P07911	589	606	N-terminus	F2 (P00734; THRB_HUMAN). F2 (P18292; THRB_RAT). F2 (P19221; THRB_MOUSE)	TRFRSGSV	MEROPS:S01.217	Endopeptidase (input)	-19.93	MEROPS score threshold (-21.09)	78	98.93
UMOD-P4	P07911	589	606	N-terminus	Hpn (O35453; HEPS_MOUSE). HPN (P05981; HEPS_HUMAN). Hpn (Q05511; HEPS_RAT)	TRFRSGSV	MEROPS:S01.224	Endopeptidase (input)	-21.01	MEROPS score threshold (-22.19)	66	98.56
UMOD-P4	P07911	589	606	C-terminus	Hpn (O35453; HEPS_MOUSE). HPN (P05981; HEPS_HUMAN). Hpn (Q05511; HEPS_RAT)	PITRKGVQ	MEROPS:S01.224	Endopeptidase (input)	-17.96	MEROPS score threshold (-22.19)	66	98.56
UMOD-P5	P07911	589	607	N-terminus	F2 (P00734; THRB_HUMAN). F2 (P18292; THRB_RAT). F2 (P19221; THRB_MOUSE)	TRFRSGSV	MEROPS:S01.217	Endopeptidase (input)	-19.93	MEROPS score threshold (-21.09)	78	98.93
UMOD-P5	P07911	589	607	N-terminus	Hpn (O35453; HEPS_MOUSE). HPN (P05981; HEPS_HUMAN). Hpn (Q05511; HEPS_RAT)	TRFRSGSV	MEROPS:S01.224	Endopeptidase (input)	-21.01	MEROPS score threshold (-22.19)	66	98.56
UMOD-P1	P07911	594	606	C-terminus	PLG (P00747; PLMN_HUMAN). Plg (P20918; PLMN_MOUSE). Plg (Q01177; PLMN_RAT)	PITRKGVQ	MEROPS:S01.233	Endopeptidase (input)	-22.56	MEROPS score threshold (-22.58)	70	94.16
UMOD-P1	P07911	594	606	C-terminus	KLK4 (Q9Y5K2; KLK4_HUMAN). Klk4 (Q9Z0M1; KLK4_MOUSE)	PITRKGVQ	MEROPS:S01.251	Endopeptidase (input)	-22.14	MEROPS score threshold (-22.45)	74	95.82
UMOD-P2	P07911	593	606	C-terminus	PLG (P00747; PLMN_HUMAN). Plg (P20918; PLMN_MOUSE). Plg (Q01177; PLMN_RAT)	PITRKGVQ	MEROPS:S01.233	Endopeptidase (input)	-22.56	MEROPS score threshold (-22.58)	70	94.16
UMOD-P2	P07911	593	606	C-terminus	KLK4 (Q9Y5K2; KLK4_HUMAN). Klk4 (Q9Z0M1; KLK4_MOUSE)	PITRKGVQ	MEROPS:S01.251	Endopeptidase (input)	-22.14	MEROPS score threshold (-22.45)	74	95.82
UMOD-P3	P07911	595	606	C-terminus	PLG (P00747; PLMN_HUMAN). Plg (P20918; PLMN_MOUSE). Plg (Q01177; PLMN_RAT)	PITRKGVQ	MEROPS:S01.233	Endopeptidase (input)	-22.56	MEROPS score threshold (-22.58)	70	94.16
UMOD-P3	P07911	595	606	C-terminus	KLK4 (Q9Y5K2; KLK4_HUMAN). Klk4 (Q9Z0M1; KLK4_MOUSE)	PITRKGVQ	MEROPS:S01.251	Endopeptidase (input)	-22.14	MEROPS score threshold (-22.45)	74	95.82
UMOD-P4	P07911	589	606	N-terminus	PLG (P00747; PLMN_HUMAN). Plg (P20918; PLMN_MOUSE). Plg (Q01177; PLMN_RAT)	TRFRSGSV	MEROPS:S01.233	Endopeptidase (input)	-18.8	MEROPS score threshold (-22.58)	70	94.16
UMOD-P4	P07911	589	606	N-terminus	KLK6 (Q92876; KLK6_HUMAN)	TRFRSGSV	MEROPS:S01.236	Endopeptidase (input)	-19.05	MEROPS score threshold (-23.61)	80	95.76
UMOD-P4	P07911	589	606	N-terminus	KLK4 (Q9Y5K2; KLK4_HUMAN). Klk4 (Q9Z0M1; KLK4_MOUSE)	TRFRSGSV	MEROPS:S01.251	Endopeptidase (input)	-20.85	MEROPS score threshold (-22.45)	74	95.82
UMOD-P4	P07911	589	606	C-terminus	PLG (P00747; PLMN_HUMAN). Plg (P20918; PLMN_MOUSE). Plg (Q01177; PLMN_RAT)	PITRKGVQ	MEROPS:S01.233	Endopeptidase (input)	-22.56	MEROPS score threshold (-22.58)	70	94.16
UMOD-P4	P07911	589	606	C-terminus	KLK4 (Q9Y5K2; KLK4_HUMAN). Klk4 (Q9Z0M1; KLK4_MOUSE)	PITRKGVQ	MEROPS:S01.251	Endopeptidase (input)	-22.14	MEROPS score threshold (-22.45)	74	95.82
UMOD-P5	P07911	589	607	N-terminus	PLG (P00747; PLMN_HUMAN). Plg (P20918; PLMN_MOUSE). Plg (Q01177; PLMN_RAT)	TRFRSGSV	MEROPS:S01.233	Endopeptidase (input)	-18.8	MEROPS score threshold (-22.58)	70	94.16
UMOD-P5	P07911	589	607	N-terminus	KLK6 (Q92876; KLK6_HUMAN)	TRFRSGSV	MEROPS:S01.236	Endopeptidase (input)	-19.05	MEROPS score threshold (-23.61)	80	95.76
UMOD-P5	P07911	589	607	N-terminus	KLK4 (Q9Y5K2; KLK4_HUMAN). Klk4 (Q9Z0M1; KLK4_MOUSE)	TRFRSGSV	MEROPS:S01.251	Endopeptidase (input)	-20.85	MEROPS score threshold (-22.45)	74	95.82
UMOD-P5	P07911	589	607	C-terminus	PLG (P00747; PLMN_HUMAN). Plg (P20918; PLMN_MOUSE). Plg (Q01177; PLMN_RAT)	ITRKGVQA	MEROPS:S01.233	Endopeptidase (input)	-20.99	MEROPS score threshold (-22.58)	70	94.16
UMOD-P5	P07911	589	607	C-terminus	KLK4 (Q9Y5K2; KLK4_HUMAN). Klk4 (Q9Z0M1; KLK4_MOUSE)	ITRKGVQA	MEROPS:S01.251	Endopeptidase (input)	-21.49	MEROPS score threshold (-22.45)	74	95.82
UMOD-P1	P07911	594	606	C-terminus	St14 (P56677; ST14_MOUSE). ST14 (Q9Y5Y6; ST14_HUMAN)	PITRKGVQ	MEROPS:S01.302	Endopeptidase (input)	-19.69	MEROPS score threshold (-20.45)	60	99.34
UMOD-P1	P07911	594	606	C-terminus	TMPRSS6 (Q8IU80; TMPS6_HUMAN). Tmprss6 (Q9DBI0; TMPS6_MOUSE)	PITRKGVQ	MEROPS:S01.308	Endopeptidase (input)	-17.32	MEROPS score threshold (-20.95)	57	98.81
UMOD-P2	P07911	593	606	C-terminus	St14 (P56677; ST14_MOUSE). ST14 (Q9Y5Y6; ST14_HUMAN)	PITRKGVQ	MEROPS:S01.302	Endopeptidase (input)	-19.69	MEROPS score threshold (-20.45)	60	99.34
UMOD-P2	P07911	593	606	C-terminus	TMPRSS6 (Q8IU80; TMPS6_HUMAN). Tmprss6 (Q9DBI0; TMPS6_MOUSE)	PITRKGVQ	MEROPS:S01.308	Endopeptidase (input)	-17.32	MEROPS score threshold (-20.95)	57	98.81
UMOD-P3	P07911	595	606	C-terminus	St14 (P56677; ST14_MOUSE). ST14 (Q9Y5Y6; ST14_HUMAN)	PITRKGVQ	MEROPS:S01.302	Endopeptidase (input)	-19.69	MEROPS score threshold (-20.45)	60	99.34
UMOD-P3	P07911	595	606	C-terminus	TMPRSS6 (Q8IU80; TMPS6_HUMAN). Tmprss6 (Q9DBI0; TMPS6_MOUSE)	PITRKGVQ	MEROPS:S01.308	Endopeptidase (input)	-17.32	MEROPS score threshold (-20.95)	57	98.81
UMOD-P4	P07911	589	606	N-terminus	St14 (P56677; ST14_MOUSE). ST14 (Q9Y5Y6; ST14_HUMAN)	TRFRSGSV	MEROPS:S01.302	Endopeptidase (input)	-19.26	MEROPS score threshold (-20.45)	60	99.34
UMOD-P4	P07911	589	606	N-terminus	TMPRSS6 (Q8IU80; TMPS6_HUMAN). Tmprss6 (Q9DBI0; TMPS6_MOUSE)	TRFRSGSV	MEROPS:S01.308	Endopeptidase (input)	-19.82	MEROPS score threshold (-20.95)	57	98.81
UMOD-P4	P07911	589	606	C-terminus	St14 (P56677; ST14_MOUSE). ST14 (Q9Y5Y6; ST14_HUMAN)	PITRKGVQ	MEROPS:S01.302	Endopeptidase (input)	-19.69	MEROPS score threshold (-20.45)	60	99.34
UMOD-P4	P07911	589	606	C-terminus	TMPRSS6 (Q8IU80; TMPS6_HUMAN). Tmprss6 (Q9DBI0; TMPS6_MOUSE)	PITRKGVQ	MEROPS:S01.308	Endopeptidase (input)	-17.32	MEROPS score threshold (-20.95)	57	98.81
UMOD-P5	P07911	589	607	N-terminus	St14 (P56677; ST14_MOUSE). ST14 (Q9Y5Y6; ST14_HUMAN)	TRFRSGSV	MEROPS:S01.302	Endopeptidase (input)	-19.26	MEROPS score threshold (-20.45)	60	99.34
UMOD-P5	P07911	589	607	N-terminus	TMPRSS6 (Q8IU80; TMPS6_HUMAN). Tmprss6 (Q9DBI0; TMPS6_MOUSE)	TRFRSGSV	MEROPS:S01.308	Endopeptidase (input)	-19.82	MEROPS score threshold (-20.95)	57	98.81
UMOD-P5	P07911	589	607	C-terminus	Pcsk5 (P41413; PCSK5_RAT). Pcsk5 (Q04592; PCSK5_MOUSE). PCSK5 (Q92824; PCSK5_HUMAN)	ITRKGVQA	MEROPS:S08.076	Endopeptidase (input)	-20.65	MEROPS score threshold (-21.35)	36	99.55
Generated by http://proteasix.cs.manchester.ac.uk on Fri Jan 14 2022 13:52:59 GMT-0300 (Brasilia Standard Time)
